# Supplementary material
Source: Copernicus journal article supplement (doi:10.5194/egusphere-2023-3024)
Supplement: Supplementary file [file egusphere-2023-3024-AC3-supplement.pdf]

## Supplementary Information

for

# A novel data-driven global model of photosynthesis using solar-induced chlorophyll fluorescence

Russell Doughty<sup>1\*</sup>, Yujie Wang<sup>2</sup>, Jennifer Johnson<sup>3</sup>, Nicholas Parazoo<sup>4</sup>, Troy Magney<sup>5</sup>, Zoe Pierrat<sup>6</sup>, Xiangming Xiao<sup>7</sup>, Luis Guanter<sup>8</sup>, Philipp Köhler<sup>9</sup>, Christian Frankenberg<sup>2,4</sup>, Peter Somkuti<sup>1</sup>, Shuang Ma<sup>4</sup>, Yuanwei Qin<sup>7</sup>, Sean Crowell<sup>10</sup>, Berrien Moore, III<sup>1</sup>

### Affiliations

<sup>1</sup>College of Atmospheric and Geographic Sciences, University of Oklahoma, OK, 73019, USA.

<sup>2</sup>Division of Geological and Planetary Sciences, California Institute of Technology, Pasadena, CA, 91125, USA.

<sup>3</sup>Department of Global Ecology, Carnegie Institution for Science, Stanford, CA 94305, USA.

<sup>4</sup>Jet Propulsion Laboratory, California Institute of Technology, Pasadena, CA, 91109, USA.

<sup>5</sup>University of California, Davis, Department of Plant Sciences, Davis, CA 95616, USA.

<sup>6</sup>University of California, Los Angeles, Department of Atmospheric and Oceanic Sciences, CA, 90095, USA.

<sup>7</sup>Department of Microbiology and Plant Biology, University of Oklahoma, Norman, OK 73019, USA.

<sup>8</sup>Research Institute of Water and Environmental Engineering (IIAMA), Universitat Politècnica de València, Valencia, Spain.

<sup>9</sup>EUMETSAT, 64295 Darmstadt, Germany.

<sup>10</sup>LumenUs Scientific Solutions, LLC, Oklahoma City, Oklahoma.

\*Corresponding author. Email: [russell.doughty@ou.edu](mailto:russell.doughty@ou.edu)

Contents:

Figures S1-S15

Table S1

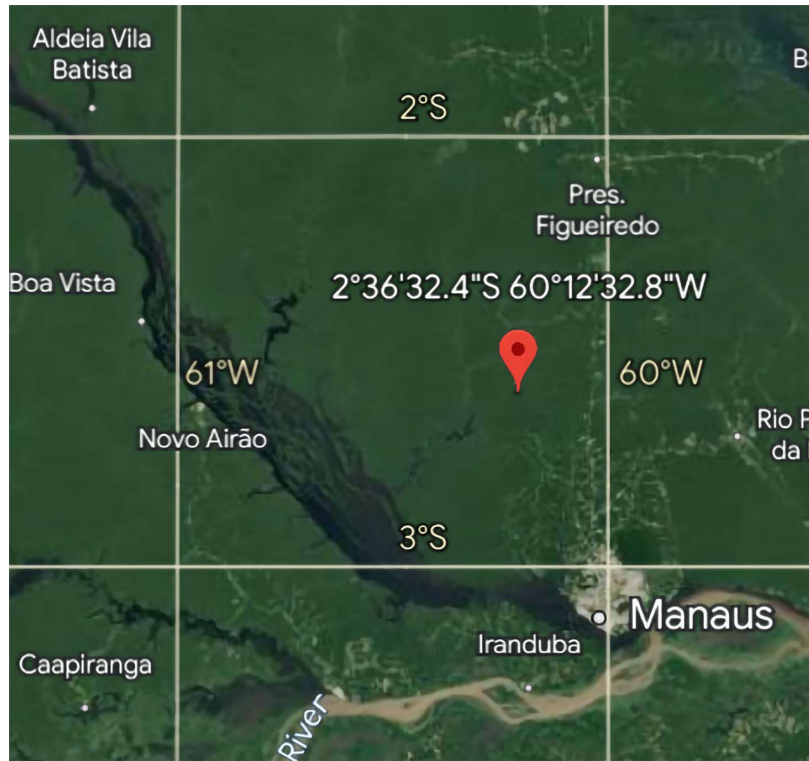

Fig. S1. Location of the BR-K34 eddy covariance tower.

### Tropical Forest

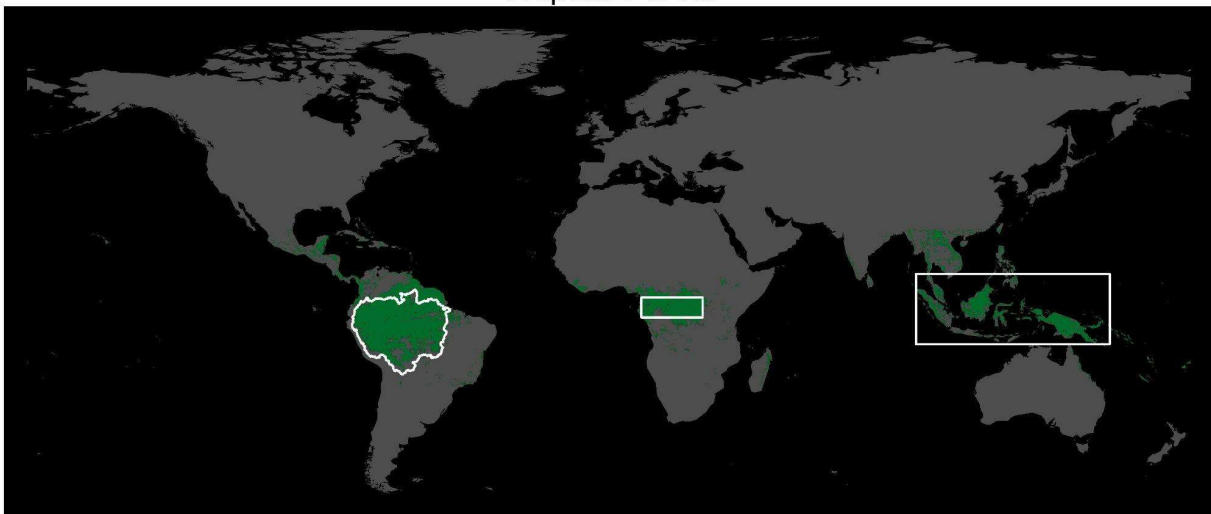

Fig. S2. Tropical evergreen broadleaf forests. White boundaries are those used to define the Amazon Basin, Congo Basin, and Southeast Asia for our regional investigations. Green represents 0.05-degree pixels which were classified as being  $> 50\%$  evergreen broadleaf forest by the MODIS MCD12C1 land cover product (Friedl & Sulla-Menashe, 2015).

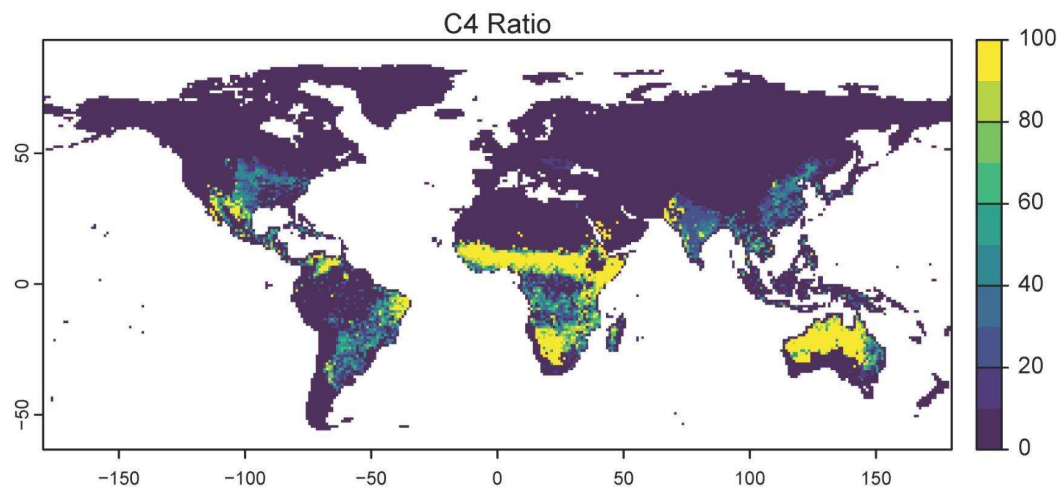

Fig. S3. Ratio of C4 vegetation in percentage.

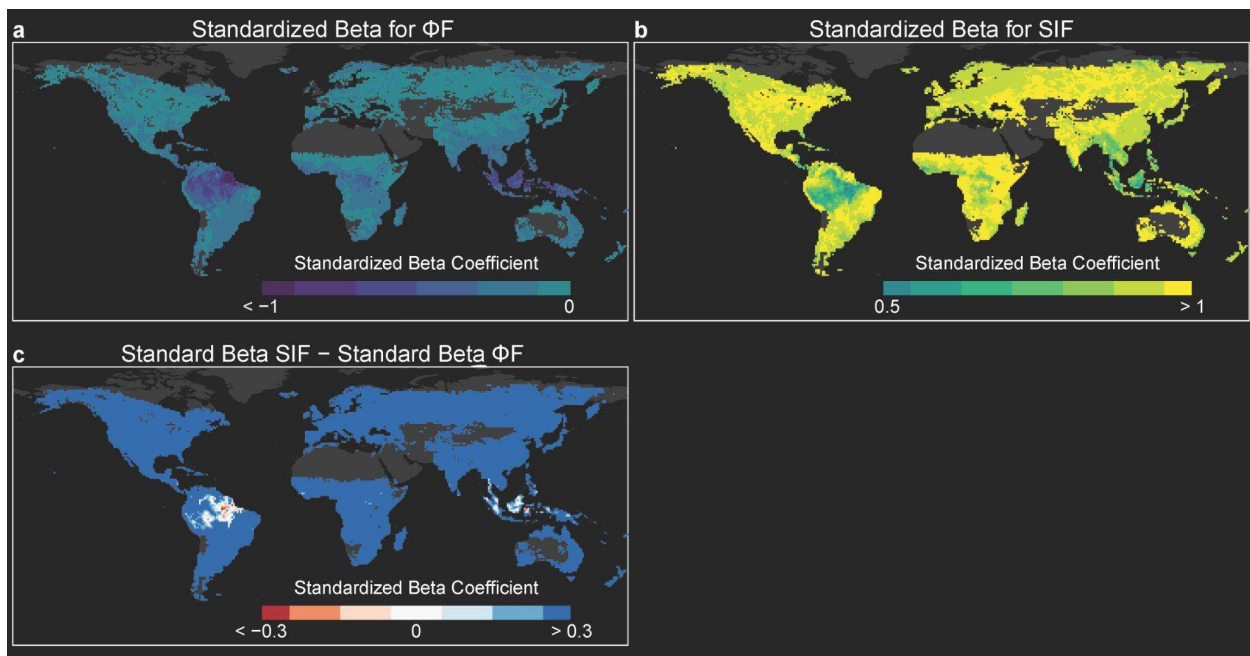

Fig. S4. Standardized beta coefficients from multiple regression using  $\Phi F + SIF$  to predict  $APAR_{chl}$ . The standardized beta coefficients reflect the relative contribution of  $\Phi F$  and SIF to  $APAR_{chl}$ , and These figures illustrate that SIF is the primary determinant of changes in  $APAR_{chl}$  in our model calculation ( $APAR_{chl} = SIF / \Phi F$ ), as the relative changes in SIF are much larger than  $\Phi F$ .

Figs. S5-S15. Annual monthly mean GPP for the eddy covariance tower site, ChloFluo, FluxCom, FluxSat, and SIF. Regression results at top right are from the respective data set versus tower GPP.

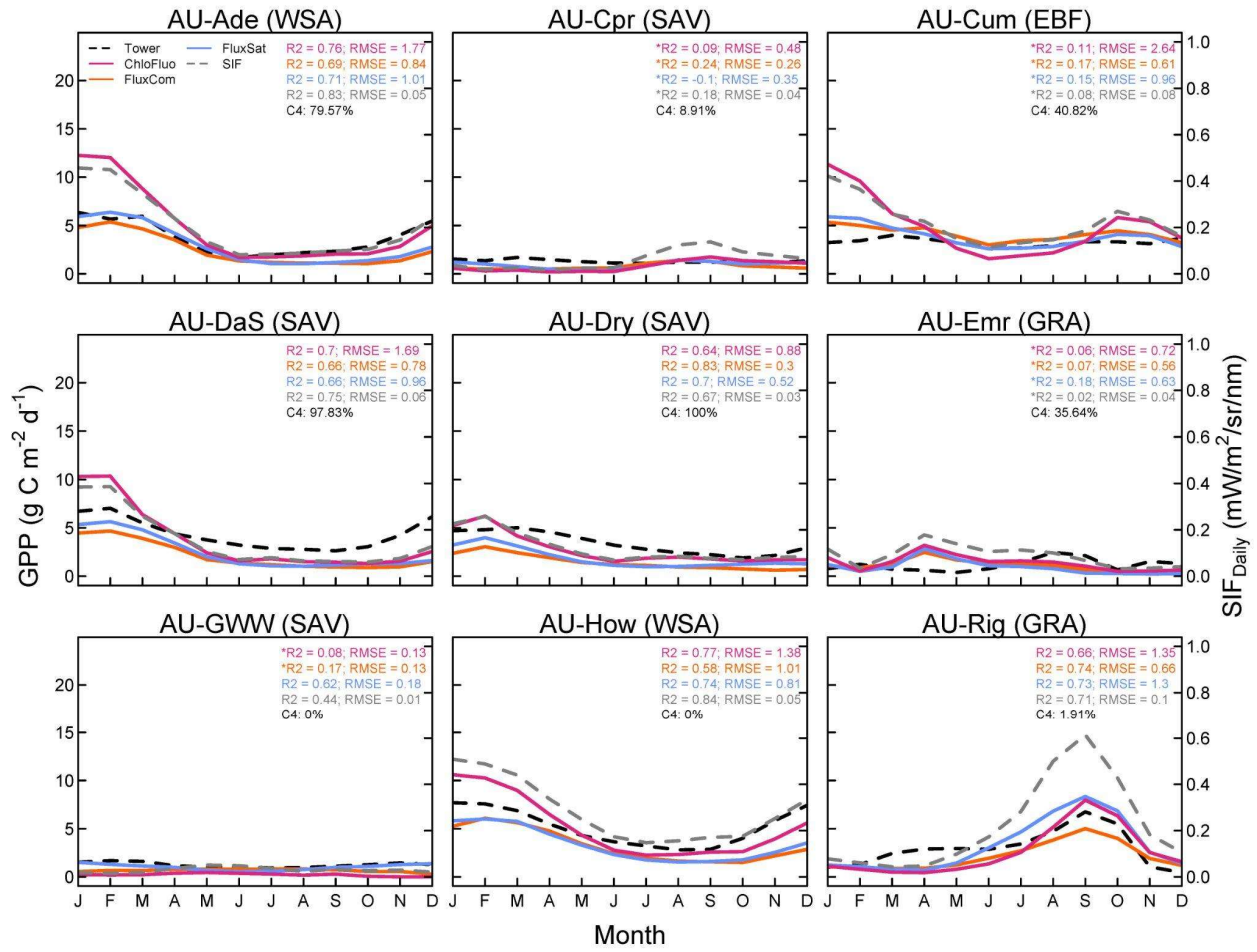

Fig. S5

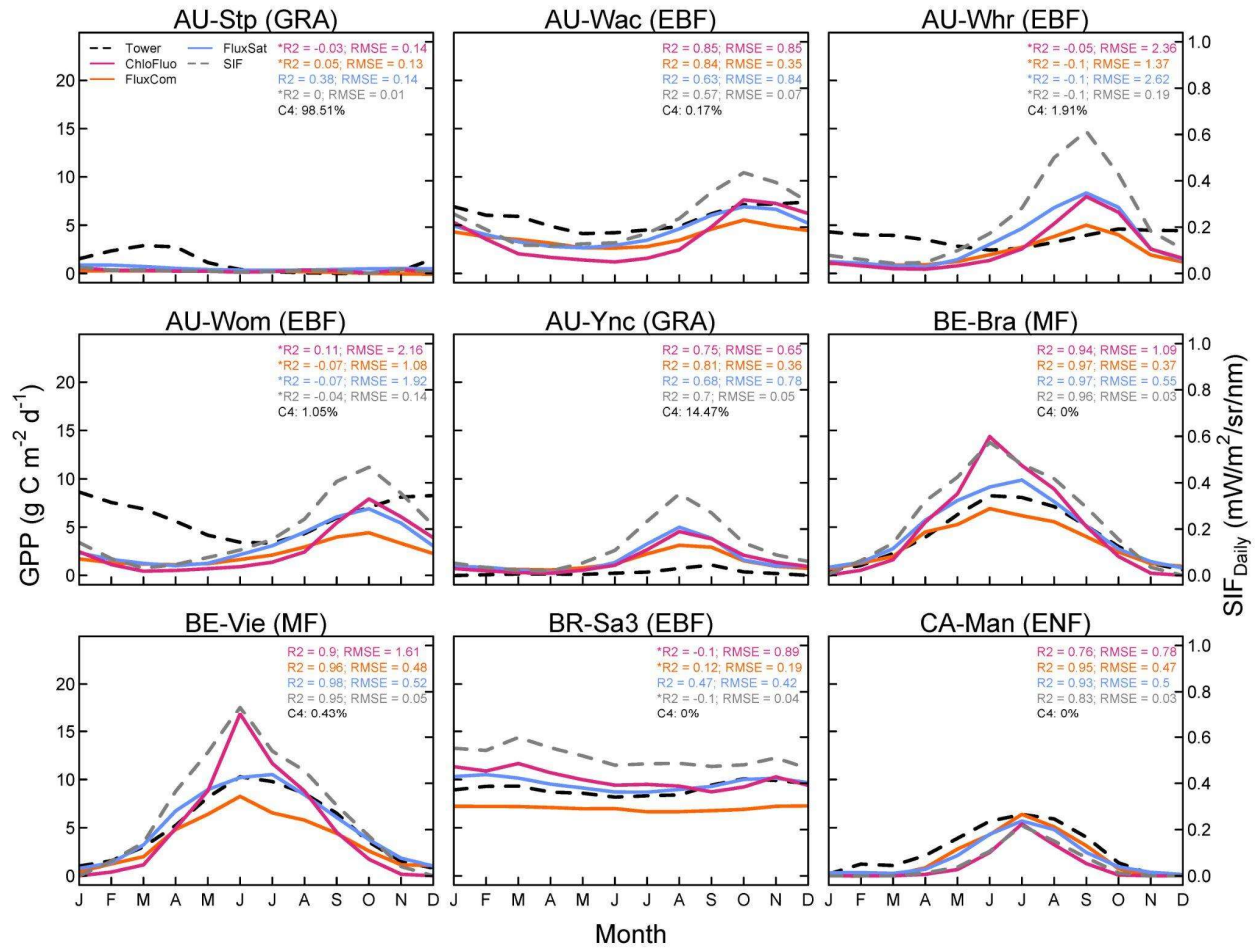

Fig. S6

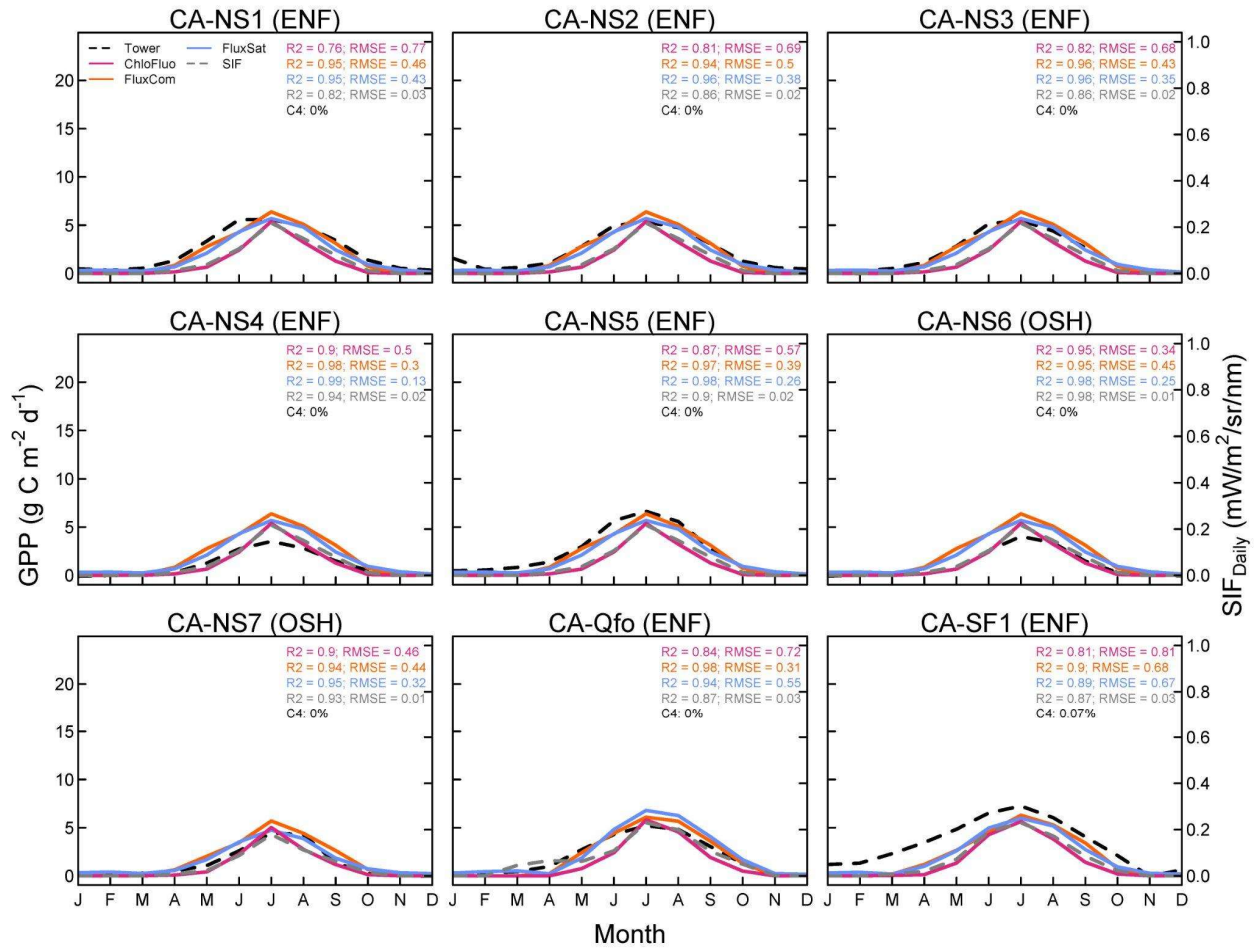

Fig. S7



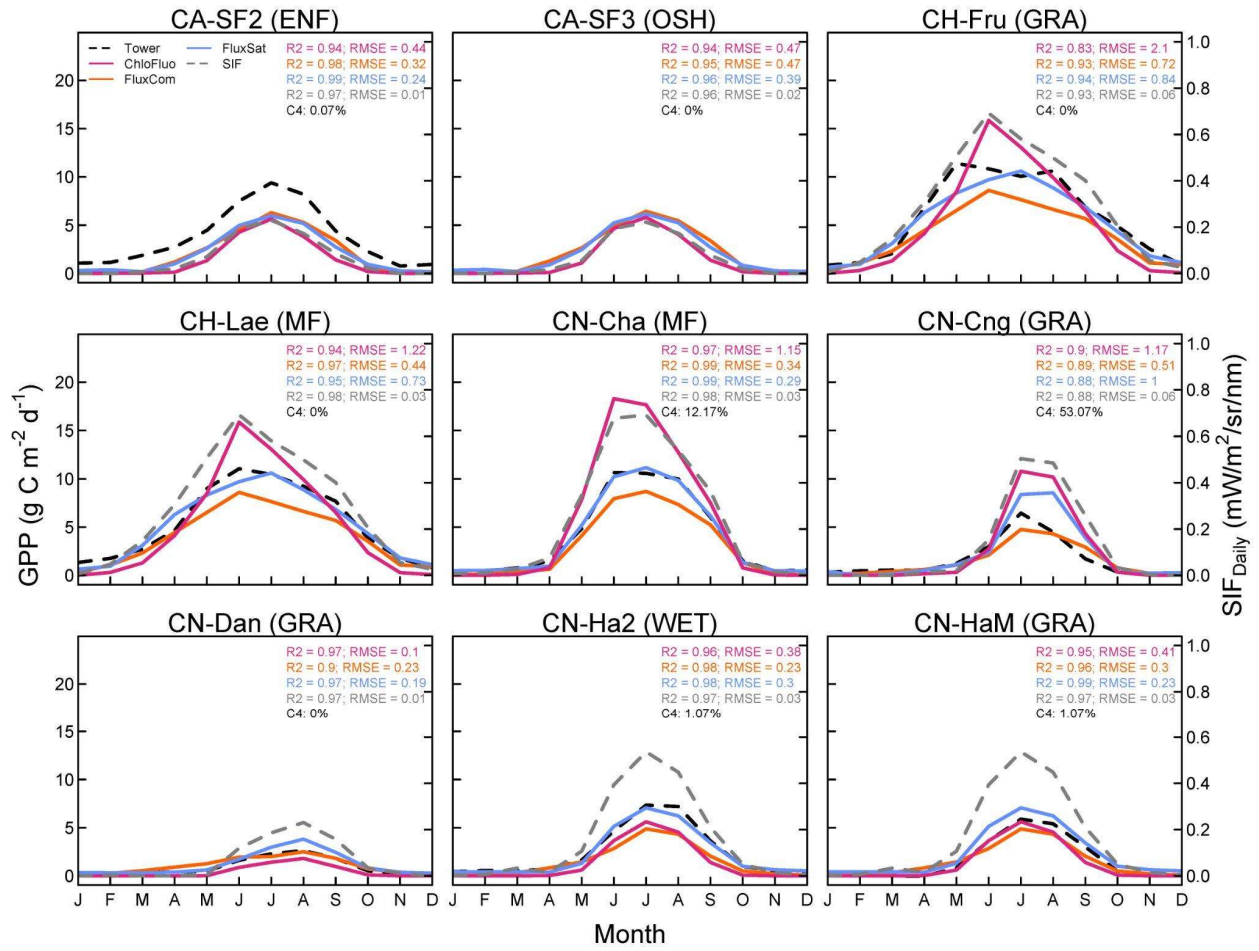

Fig. S8

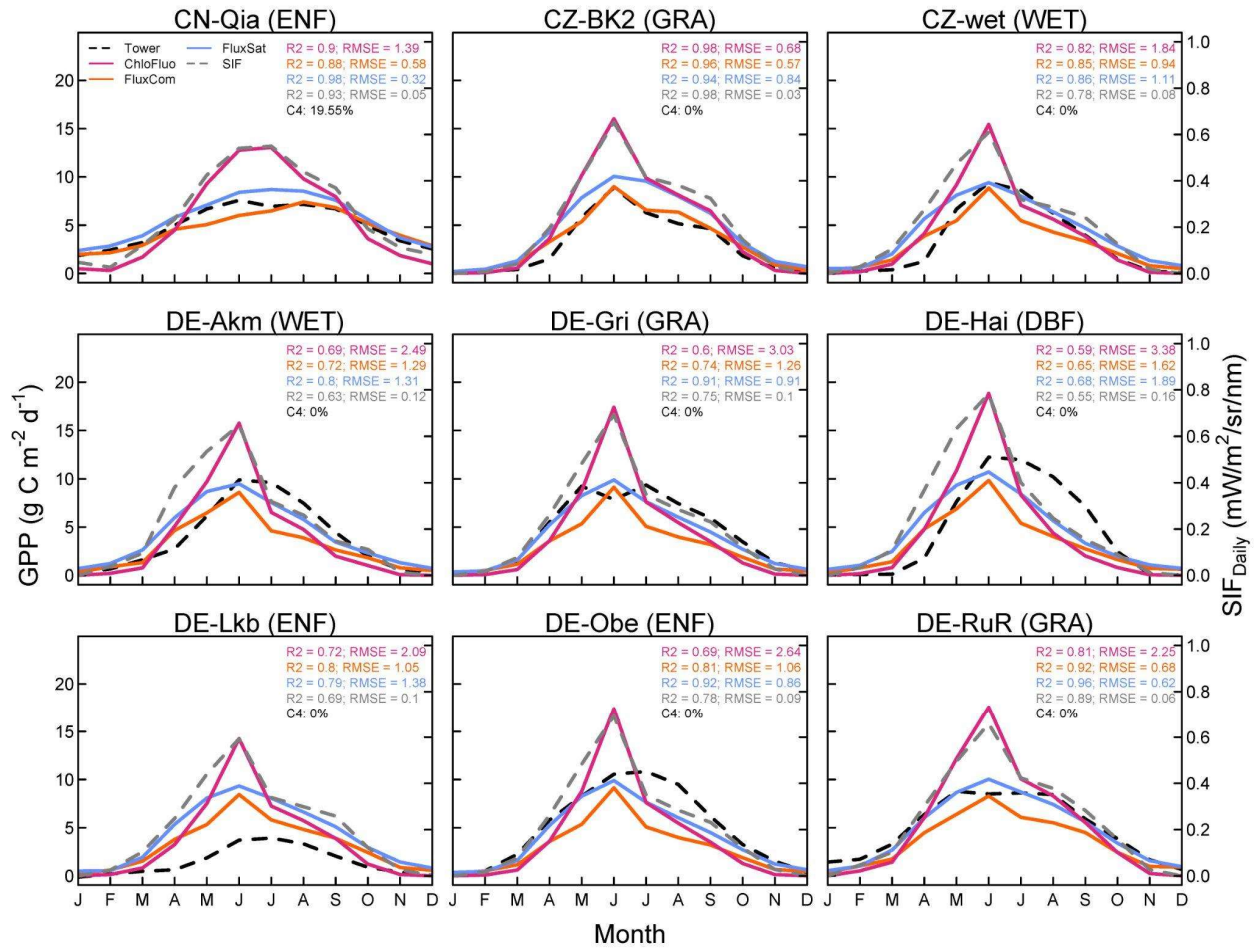

Fig. S9



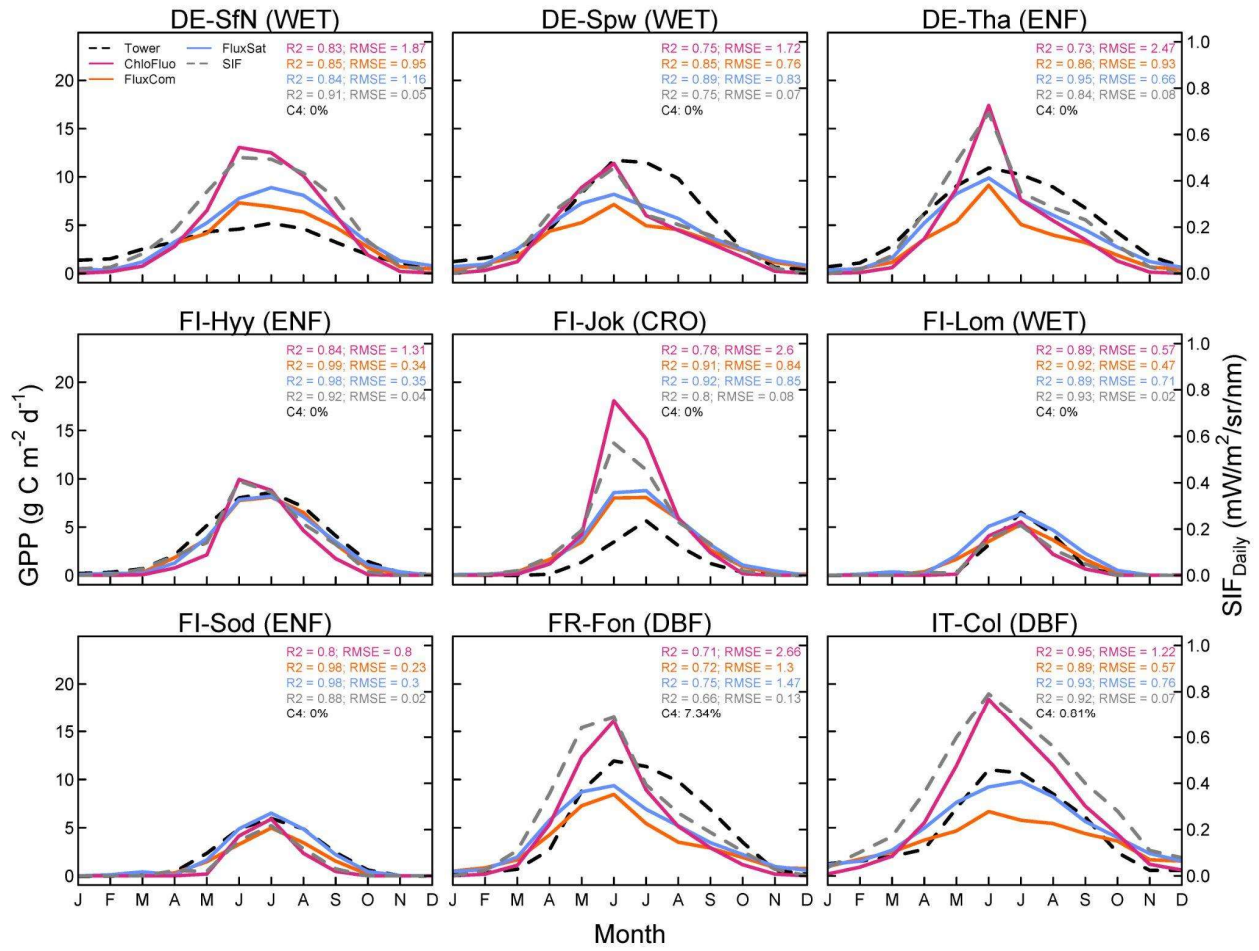

Fig. S10

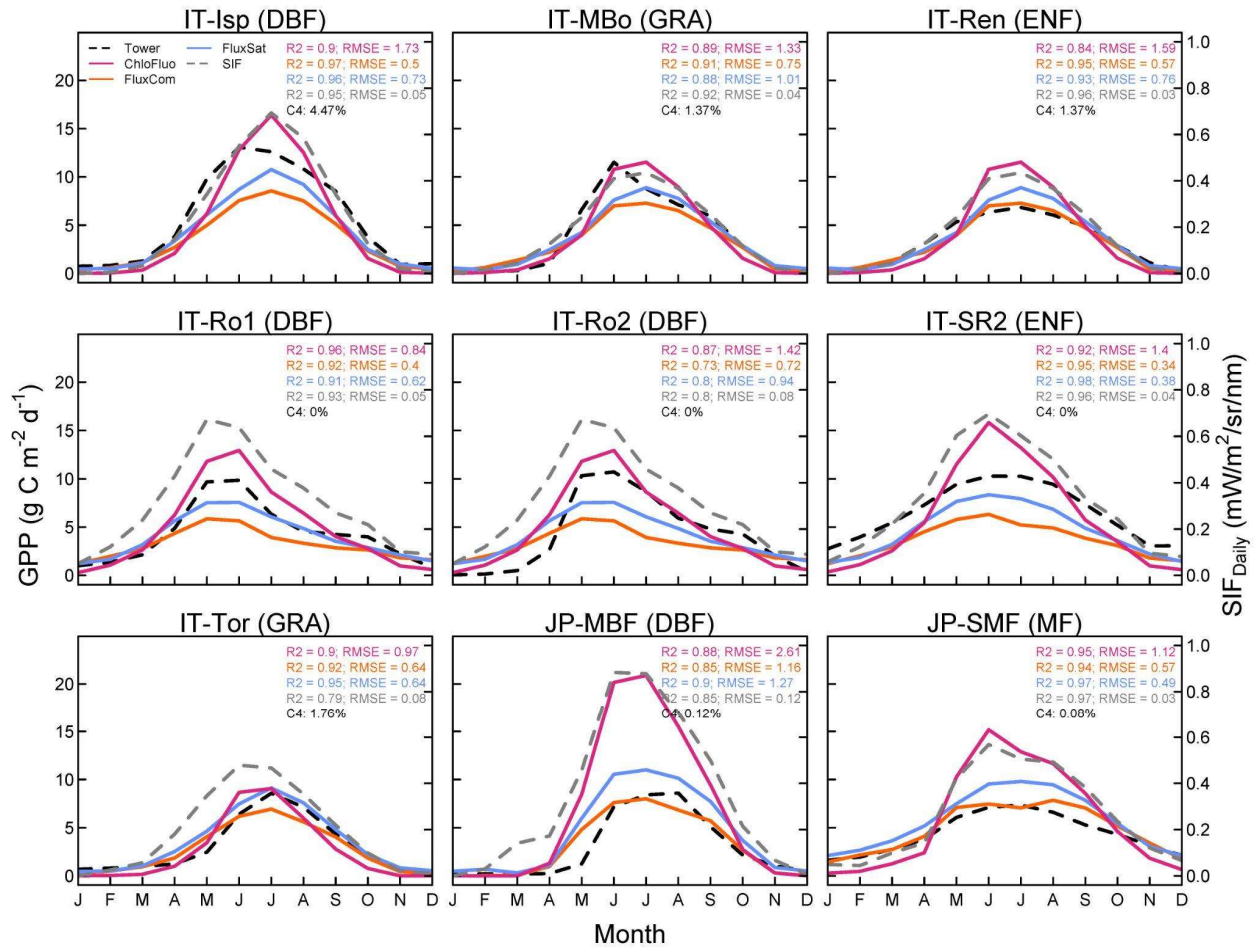

Fig. S11

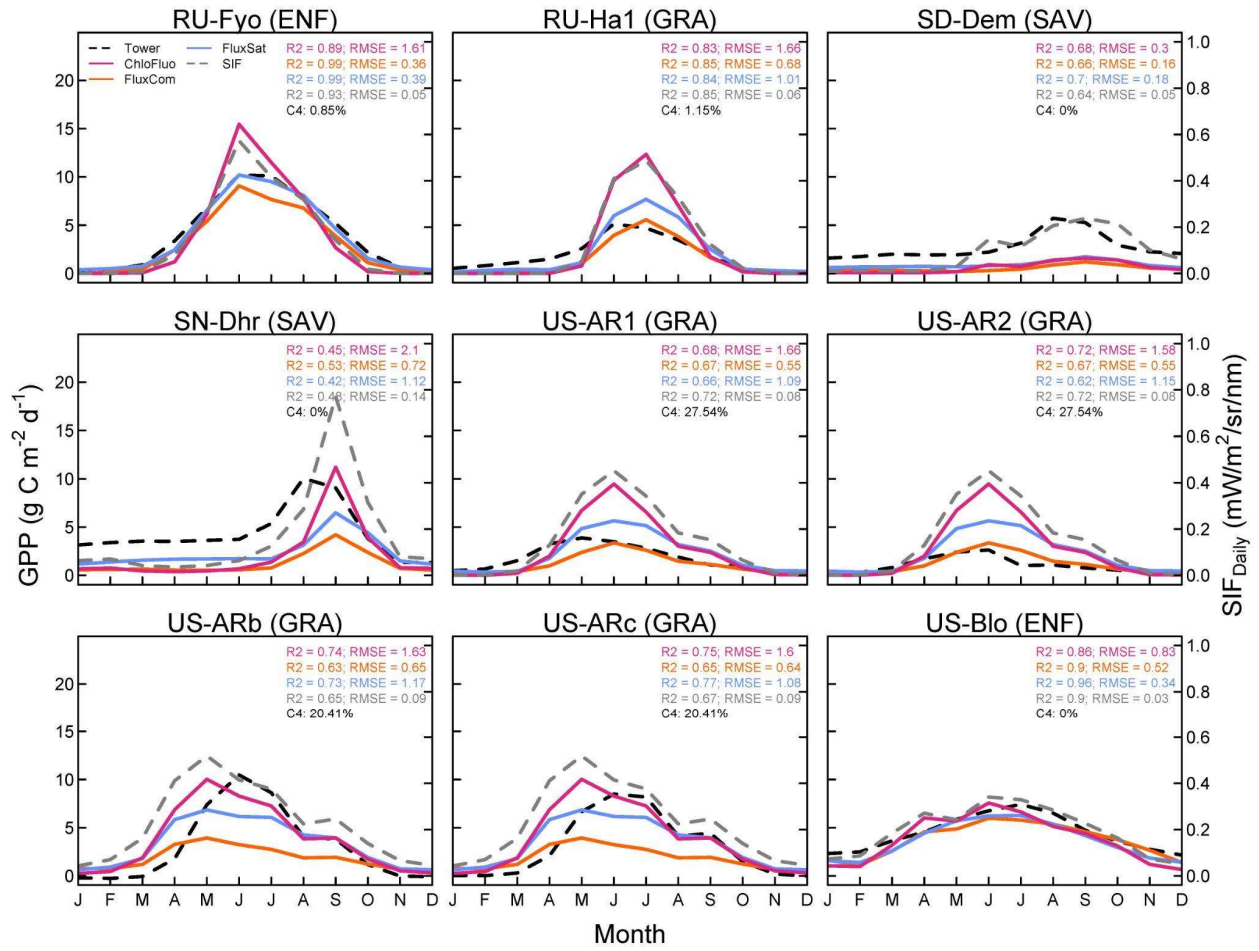

Fig. S12

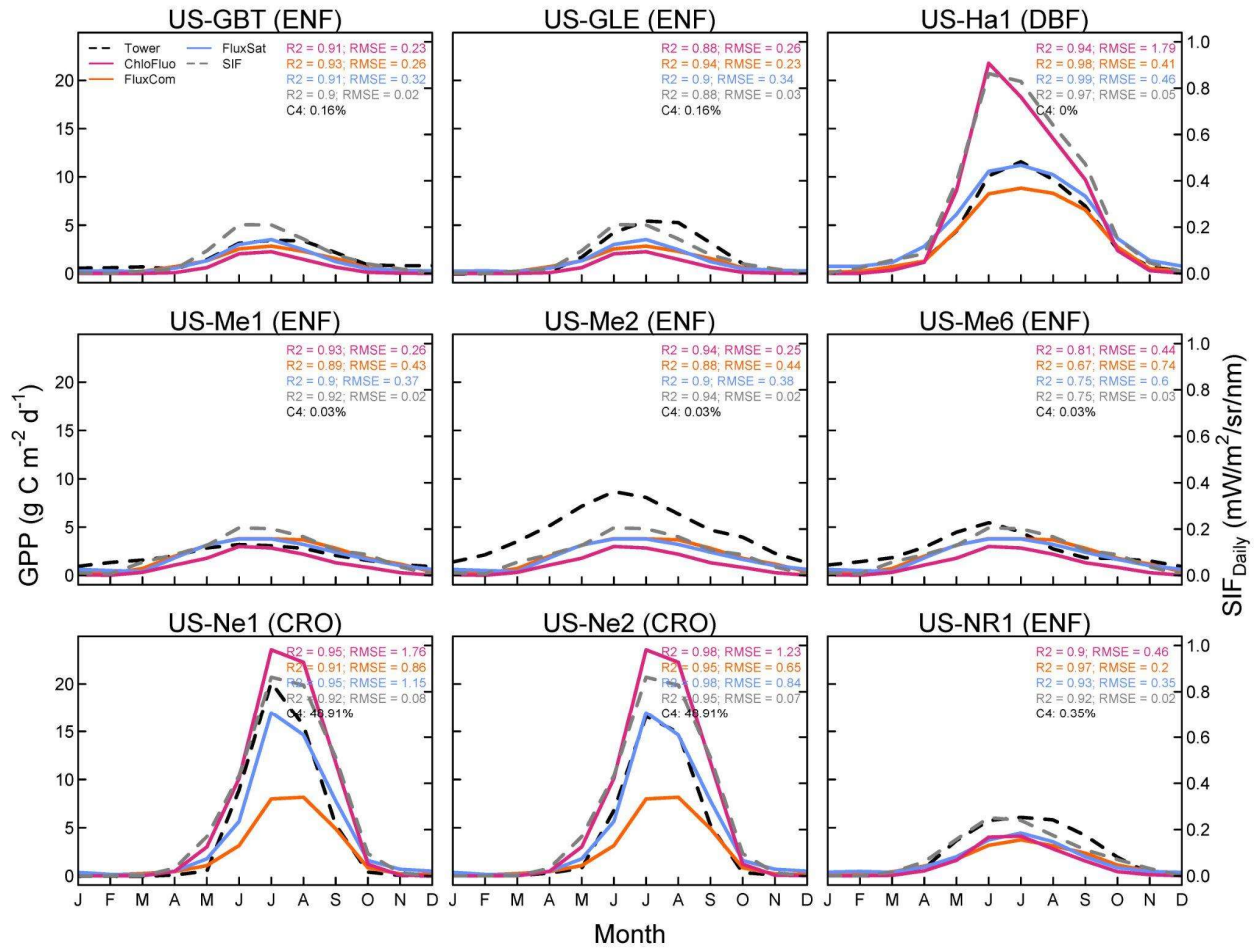

Fig. S13

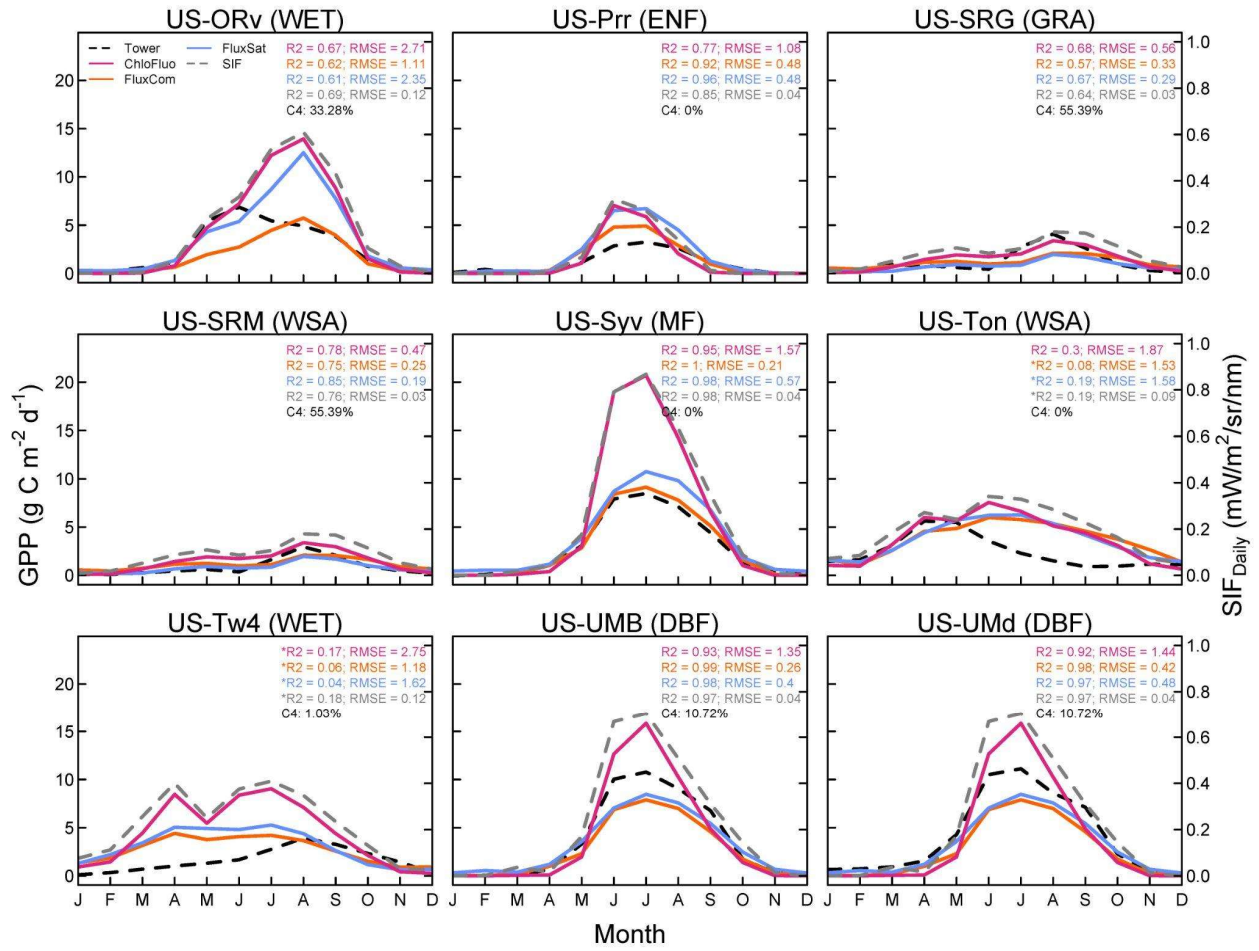

Fig. S14

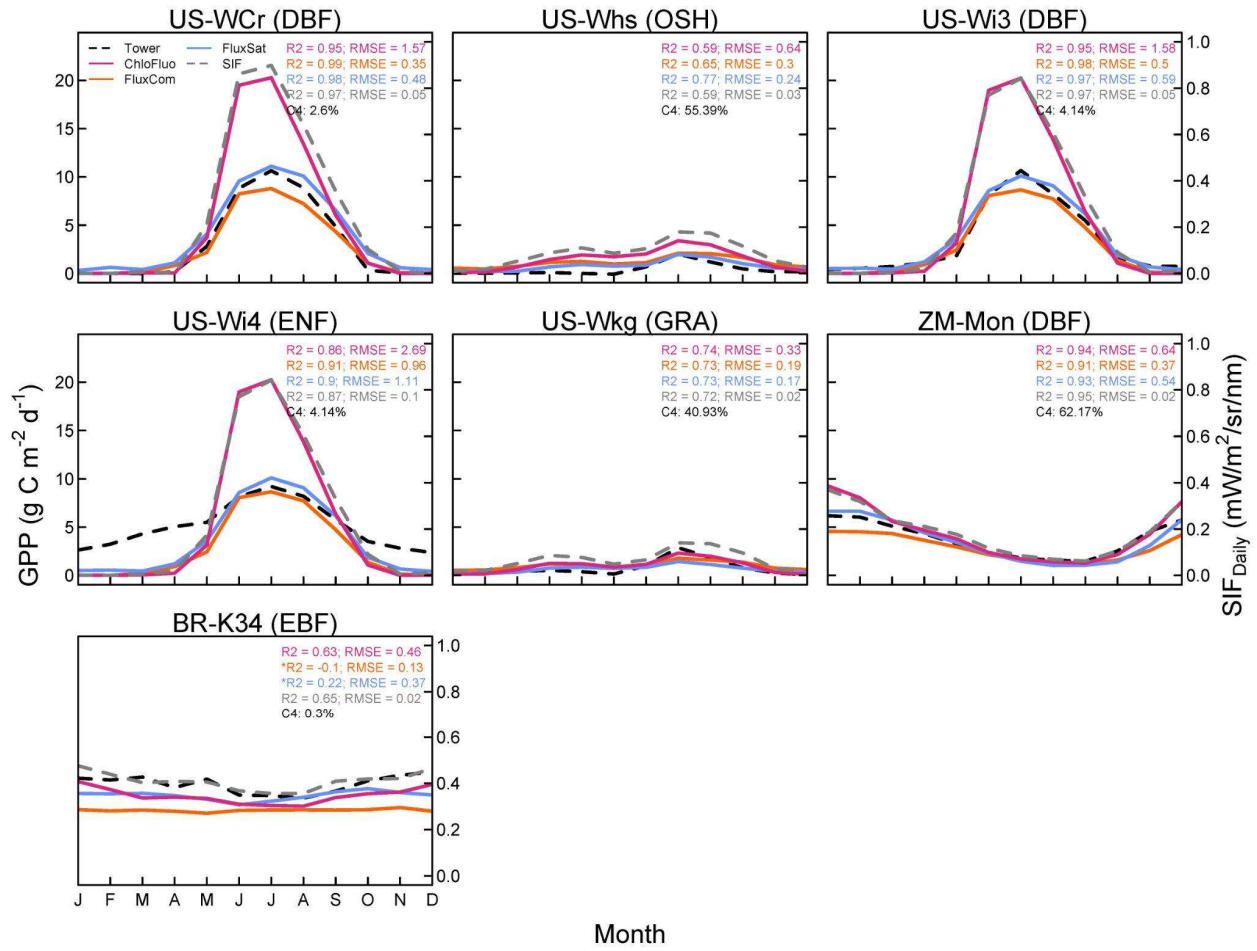

Fig. S15

Table S1. List of eddy covariance towers used for comparison to ChloFluo, FluxSat, FluxCom, and TROPOMI SIF.

| Site   | Lat.    | Lon.    | Veg. | Start | End  | Reference                   |
|--------|---------|---------|------|-------|------|-----------------------------|
| AU-Ade | -13.077 | 131.118 | WSA  | 2007  | 2009 | Beringer and Hutley (2015b) |
| AU-Cpr | -34.002 | 140.589 | SAV  | 2010  | 2014 | Meyer et al. (2015)         |
| AU-Cum | -33.613 | 150.723 | EBF  | 2012  | 2014 | Pendall and Griebel (2015)  |



|        |         |         |     |      |      |                             |
|--------|---------|---------|-----|------|------|-----------------------------|
| AU-DaS | -14.159 | 131.388 | SAV | 2008 | 2014 | Beringer and Hutley (2015e) |
| AU-Dry | -15.259 | 132.371 | SAV | 2008 | 2014 | Beringer and Hutley (2015c) |
| AU-Emr | -23.859 | 148.475 | GRA | 2011 | 2013 | Schroder et al. (2015)      |
| AU-GWW | -30.191 | 120.654 | SAV | 2013 | 2014 | Macfarlane et al. (2015b)   |
| AU-How | -12.494 | 131.152 | WSA | 2001 | 2014 | Beringer and Hutley (2015a) |
| AU-Rig | -36.65  | 145.576 | GRA | 2011 | 2014 | Beringer et al. (2015a)     |
| AU-Stp | -17.151 | 133.35  | GRA | 2008 | 2014 | Beringer and Hutley (2015d) |
| AU-Wac | -37.426 | 145.188 | EBF | 2005 | 2008 | Beringer et al. (2015c)     |
| AU-Whr | -36.673 | 145.029 | EBF | 2011 | 2014 | Beringer et al. (2015b)     |
| AU-Wom | -37.422 | 144.094 | EBF | 2010 | 2014 | Arndt et al. (2015)         |
| AU-Ync | -34.989 | 146.291 | GRA | 2012 | 2014 | Beringer and Walker (2015)  |
| BE-Bra | 51.309  | 4.521   | MF  | 1996 | 2014 | Janssens et al. (2015)      |
| BE-Vie | 50.305  | 5.998   | MF  | 1996 | 2014 | Ligne et al. (2015)         |
| BR-Sa3 | -3.018  | -54.971 | EBF | 2000 | 2004 | Goulden (2015a)             |
| CA-Man | 55.88   | -98.481 | ENF | 1994 | 2008 | Amiro (2015a)               |
| CA-NS1 | 55.879  | -98.484 | ENF | 2001 | 2005 | Goulden (2015b)             |

|        |        |          |     |      |      |                         |
|--------|--------|----------|-----|------|------|-------------------------|
| CA-NS2 | 55.906 | -98.525  | ENF | 2001 | 2005 | Goulden (2015c)         |
| CA-NS3 | 55.912 | -98.382  | ENF | 2001 | 2005 | Goulden (2015d)         |
| CA-NS4 | 55.912 | -98.382  | ENF | 2002 | 2005 | Goulden (2015g)         |
| CA-NS5 | 55.863 | -98.485  | ENF | 2001 | 2005 | Goulden (2015e)         |
| CA-NS6 | 55.917 | -98.964  | OSH | 2001 | 2005 | Goulden (2015f)         |
| CA-NS7 | 56.636 | -99.948  | OSH | 2002 | 2005 | Goulden (2015h)         |
| CA-Qfo | 49.693 | -74.342  | ENF | 2003 | 2010 | Margolis (2015)         |
| CA-SF1 | 54.485 | -105.818 | ENF | 2003 | 2006 | Amiro (2015d)           |
| CA-SF2 | 54.254 | -105.878 | ENF | 2001 | 2005 | Amiro (2015c)           |
| CA-SF3 | 54.092 | -106.005 | OSH | 2001 | 2006 | Amiro (2015b)           |
| CH-Fru | 47.116 | 8.538    | GRA | 2005 | 2014 | Hörtnagl et al. (2015b) |
| CH-Lae | 47.478 | 8.365    | MF  | 2004 | 2014 | Hörtnagl et al. (2015a) |
| CN-Cha | 42.403 | 128.096  | MF  | 2003 | 2005 | Zhang (2015)            |
| CN-Cng | 44.593 | 123.509  | GRA | 2007 | 2010 | Dong (2015)             |
| CN-Dan | 30.498 | 91.066   | GRA | 2004 | 2005 | Shi et al. (2015)       |
| CN-Ha2 | 37.609 | 101.327  | WET | 2003 | 2005 | Li (2015)               |
| CN-HaM | 37.37  | 101.18   | GRA | 2002 | 2004 | Tang et al. (2015)      |
| CN-Qia | 26.741 | 115.058  | ENF | 2003 | 2005 | Wang and Fu (2015)      |

|        |        |        |     |      |      |                          |
|--------|--------|--------|-----|------|------|--------------------------|
| CZ-BK2 | 49.494 | 18.543 | GRA | 2004 | 2012 | Sigut et al. (2015)      |
| CZ-wet | 49.025 | 14.77  | WET | 2006 | 2014 | Dus?ek et al. (2015)     |
| DE-Akm | 53.866 | 13.683 | WET | 2009 | 2014 | Bernhofer et al. (2015e) |
| DE-Gri | 50.95  | 13.512 | GRA | 2004 | 2014 | Bernhofer et al. (2015b) |
| DE-Hai | 51.079 | 10.453 | DBF | 2000 | 2012 | Knohl et al. (2015)      |
| DE-Lkb | 49.1   | 13.305 | ENF | 2009 | 2013 | Lindauer et al. (2015)   |
| DE-Obe | 50.784 | 13.72  | ENF | 2008 | 2014 | Bernhofer et al. (2015d) |
| DE-RuR | 50.622 | 6.304  | GRA | 2011 | 2014 | Schmidt and Graf (2015)  |
| DE-SfN | 47.806 | 11.328 | WET | 2012 | 2014 | Klatt et al. (2015)      |
| DE-Spw | 51.892 | 14.034 | WET | 2010 | 2014 | Bernhofer et al. (2015c) |
| DE-Tha | 50.964 | 13.567 | ENF | 1996 | 2014 | Bernhofer et al. (2015a) |
| FI-Hyy | 61.847 | 24.295 | ENF | 1996 | 2014 | Mammarella et al. (2015) |
| FI-Jok | 60.899 | 23.514 | CRO | 2000 | 2003 | Lohila et al. (2015)     |
| FI-Lom | 67.997 | 24.209 | WET | 2007 | 2009 | Aurela et al. (2015a)    |
| FI-Sod | 67.362 | 26.638 | ENF | 2001 | 2014 | Aurela et al. (2015b)    |
| FR-Fon | 48.476 | 2.78   | DBF | 2005 | 2014 | Berveiller et al. (2015) |
| IT-Col | 41.849 | 13.588 | DBF | 1996 | 2014 | Matteucci (2015)         |
| IT-Isp | 45.813 | 8.634  | DBF | 2013 | 2014 | Gruening et al. (2015)   |

|        |        |          |     |      |      |                               |
|--------|--------|----------|-----|------|------|-------------------------------|
| IT-MBo | 46.015 | 11.046   | GRA | 2003 | 2013 | Gianelle et al. (2015)        |
| IT-Ren | 46.587 | 11.434   | ENF | 1998 | 2013 | Montagnani and Minerbi (2015) |
| IT-Ro1 | 42.408 | 11.93    | DBF | 2000 | 2008 | Valentini et al. (2015a)      |
| IT-Ro2 | 42.39  | 11.921   | DBF | 2002 | 2012 | Papale et al. (2015)          |
| IT-SR2 | 43.732 | 10.291   | ENF | 2013 | 2014 | Arriga et al. (2015)          |
| IT-Tor | 45.844 | 7.578    | GRA | 2008 | 2014 | Cremonese et al. (2015)       |
| JP-MBF | 44.387 | 142.319  | DBF | 2003 | 2005 | Kotani (2015b)                |
| JP-SMF | 35.262 | 137.079  | MF  | 2002 | 2006 | Kotani (2015a)                |
| RU-Fyo | 56.461 | 32.922   | ENF | 1998 | 2014 | Varlagin et al. (2015)        |
| RU-Ha1 | 54.725 | 90.002   | GRA | 2002 | 2004 | Belelli et al. (2015)         |
| SD-Dem | 13.283 | 30.478   | SAV | 2005 | 2009 | Ardö et al. (2015)            |
| SN-Dhr | 15.403 | -15.432  | SAV | 2010 | 2013 | Tagesson et al. (2015)        |
| US-AR1 | 36.427 | -99.42   | GRA | 2009 | 2012 | Billesbach et al. (2015a)     |
| US-AR2 | 36.636 | -99.598  | GRA | 2009 | 2012 | Billesbach et al. (2015b)     |
| US-ARb | 35.55  | -98.04   | GRA | 2005 | 2006 | Torn (2015a)                  |
| US-ARc | 35.547 | -98.04   | GRA | 2005 | 2006 | Torn (2015b)                  |
| US-Blo | 38.895 | -120.633 | ENF | 1997 | 2007 | Goldstein (2015)              |

|        |        |          |     |      |      |                             |
|--------|--------|----------|-----|------|------|-----------------------------|
| US-GBT | 41.366 | -106.24  | ENF | 1996 | 2006 | Massman (2015a)             |
| US-GLE | 41.367 | -106.24  | ENF | 2004 | 2014 | Massman (2015b)             |
| US-Ha1 | 42.538 | -72.172  | DBF | 1991 | 2012 | Munger (2015)               |
| US-Me1 | 44.579 | -121.5   | ENF | 2004 | 2005 | Law (2015b)                 |
| US-Me2 | 44.452 | -121.557 | ENF | 2002 | 2014 | Law (2015a)                 |
| US-Me6 | 44.323 | -121.608 | ENF | 2010 | 2014 | Law (2015c)                 |
| US-Ne1 | 41.165 | -96.477  | CRO | 2001 | 2013 | Suyker (2015a)              |
| US-Ne2 | 41.165 | -96.47   | CRO | 2001 | 2013 | Suyker (2015b)              |
| US-NR1 | 40.033 | -105.546 | ENF | 1998 | 2014 | Blanken et al. (2015)       |
| US-ORv | 40.02  | -83.018  | WET | 2011 | 2011 | Bohrer (2015)               |
| US-Prr | 65.124 | -147.488 | ENF | 2010 | 2014 | Kobayashi and Suzuki (2015) |
| US-SRG | 31.789 | -110.828 | GRA | 2008 | 2014 | Scott (2015d)               |
| US-SRM | 31.821 | -110.866 | WSA | 2004 | 2014 | Scott (2015c)               |
| US-Syv | 46.242 | -89.348  | MF  | 2001 | 2014 | Desai (2015b)               |
| US-Ton | 38.432 | -120.966 | WSA | 2001 | 2014 | Baldocchi and Ma (2015)     |
| US-Tw4 | 38.103 | -121.641 | WET | 2013 | 2014 | Sanchez et al. (2015)       |
| US-UMB | 45.56  | -84.714  | DBF | 2000 | 2014 | Gough et al. (2015a)        |

|        |         |          |     |      |      |                      |
|--------|---------|----------|-----|------|------|----------------------|
| US-UMd | 45.562  | -84.698  | DBF | 2007 | 2014 | Gough et al. (2015b) |
| US-WCr | 45.806  | -90.08   | DBF | 1999 | 2014 | Desai (2015a)        |
| US-Whs | 31.744  | -110.052 | OSH | 2007 | 2014 | Scott (2015b)        |
| US-Wi3 | 46.635  | -91.099  | DBF | 2002 | 2004 | Chen (2015a)         |
| US-Wi4 | 46.739  | -91.166  | ENF | 2002 | 2005 | Chen (2015b)         |
| US-Wkg | 31.736  | -109.942 | GRA | 2004 | 2014 | Scott (2015a)        |
| ZM-Mon | -15.438 | 23.253   | DBF | 2000 | 2009 | Kutsch et al. (2015) |
| BR-K34 | -2.6091 | -60.2093 | EBF | 1999 | 2006 | Wu et al. (2015)     |
